# Supplementary material
Source: publisher site journal article supplement (https://www.spandidos-publications.com/4663/downloadSupplementary)
Supplement: Supplementary file 1 [file downloadSupplementary]

Table SI. Surgical site infection definitions.

| Type                       | Definition                                                                                                                                                                                                                                                                                                           |
|----------------------------|----------------------------------------------------------------------------------------------------------------------------------------------------------------------------------------------------------------------------------------------------------------------------------------------------------------------|
| Superficial incisional SSI | Infection occurs within 30 days after the operation; and infection involves only skin or subcutaneous tissue of the incision; and at least one of the following:                                                                                                                                                     |
|                            | 1. Purulent drainage, with or without laboratory confirmation, from the superficial incision.                                                                                                                                                                                                                        |
|                            | 2. Organisms isolated from an aseptically obtained culture of fluid or tissue from the superficial incision.                                                                                                                                                                                                         |
|                            | 3. At least one of the following signs or symptoms of infection: Pain or tenderness, localized swelling, redness or heat, and superficial incision is deliberately opened by surgeon, unless incision is culture-negative.                                                                                           |
|                            | 4. Diagnosis of superficial incisional SSI by the surgeon or attending physician.                                                                                                                                                                                                                                    |
|                            | Do not report the following conditions as SSI:                                                                                                                                                                                                                                                                       |
|                            | 1. Stitch abscess (minimal inflammation and discharge confined to the points of suture penetration).                                                                                                                                                                                                                 |
|                            | 2. Infection of an episiotomy or newborn circumcision site.                                                                                                                                                                                                                                                          |
|                            | 3. Infected burn wound.                                                                                                                                                                                                                                                                                              |
|                            | 4. Incisional SSI that extends into the fascial and muscle layers (see deep incisional SSI).                                                                                                                                                                                                                         |
| Deep incisional SSI        | Infection occurs within 30 days after the operation if no implant is left in place or within 1 year if implant is in place; and the infection appears to be related to the operation; and infection involves deep soft tissues (e.g., fascial and muscle layers) of the incision; and at least one of the following: |

|  |                                                                                                                                                                                                                                       |
|--|---------------------------------------------------------------------------------------------------------------------------------------------------------------------------------------------------------------------------------------|
|  | 1. Purulent drainage from the deep incision but not from the organ/space component of the surgical site.                                                                                                                              |
|  | 2. A deep incision spontaneously dehisces or is deliberately opened by a surgeon when the patient has at least one of the following signs or symptoms: fever (>38°C), localized pain, or tenderness, unless site is culture-negative. |
|  | 3. An abscess or other evidence of infection involving the deep incision is found on direct examination, during reoperation, or by histopathologic or radiologic examination.                                                         |
|  | 4. Diagnosis of a deep incisional SSI by a surgeon or attending physician.                                                                                                                                                            |

Table SII. Laboratory examination.

| A, White blood cell (normal range, 3300-8600) |                |       |       |      |      |      |      |         |         |
|-----------------------------------------------|----------------|-------|-------|------|------|------|------|---------|---------|
| Examination                                   | Patient number |       |       |      |      |      |      | Average | P-value |
|                                               | 1              | 2     | 3     | 4    | 5    | 6    | 7    |         |         |
| Initial presentation                          | 14610          | 14820 | 11310 | 6200 | 5820 | 8530 | 9890 | 10169   |         |
| 1 week after surgery                          | 8120           | 7150  | 13810 | 3700 | 7060 | 4830 | 6940 | 7373    | 0.26    |
| 2 weeks after surgery                         | 5770           | 7570  | 10230 | 3200 | 6080 | 5570 | 6880 | 6471    | 0.15    |
| 3 weeks after surgery                         | 6220           |       | 8400  |      |      |      |      |         |         |
| 4 weeks after surgery                         |                | 16990 | 6750  |      |      |      |      |         |         |
| 5 weeks after surgery                         |                | 8430  | 6240  |      |      |      |      |         |         |
| 6 weeks after surgery                         |                | 5340  |       |      |      |      |      |         |         |

| B, C-reactive protein (normal range, 0-0.15) |                |      |      |     |      |      |      |         |         |
|----------------------------------------------|----------------|------|------|-----|------|------|------|---------|---------|
| Examination                                  | Patient number |      |      |     |      |      |      | Average | P-value |
|                                              | 1              | 2    | 3    | 4   | 5    | 6    | 7    |         |         |
| Initial presentation                         | 13.1           | 27.7 | 0.11 | 2.3 | 0.13 | 15.1 | 0.2  | 8.4     |         |
| 1 week after surgery                         | 4.8            | 0.95 | 0.67 | 0.7 | 6.6  | 0.97 | 1.2  | 2.3     | 0.75    |
| 2 weeks after surgery                        | 1.2            | 0.49 | 6.3  | 0   | 0.81 | 0.23 | 0.25 | 1.3     | 0.63    |
| 3 weeks after surgery                        | 0.15           |      | 0.28 |     |      |      |      |         |         |
| 4 weeks after surgery                        |                | 12.9 | 0.09 |     |      |      |      |         |         |
| 5 weeks after surgery                        |                | 0.72 | 0.11 |     |      |      |      |         |         |
| 6 weeks after surgery                        |                | 0.22 |      |     |      |      |      |         |         |
| C, Hemoglobin (normal range, 13.7-16.8)      |                |      |      |     |      |      |      |         |         |

| Examination                                 | Patient number |      |      |      |      |      |      | Average | P-value |
|---------------------------------------------|----------------|------|------|------|------|------|------|---------|---------|
|                                             | 1              | 2    | 3    | 4    | 5    | 6    | 7    |         |         |
| Initial presentation                        | 8.7            | 8.2  | 13.8 | 13.1 | 12.2 | 9.5  | 14.4 | 11.4    |         |
| 1 week after surgery                        | 10.3           | 9.4  | 10.6 | 10   | 9.1  | 10   | 13.7 | 10.4    | 0.34    |
| 2 weeks after surgery                       | 11             | 10.1 | 9.8  | 11.4 | 9.5  | 11.4 | 14.2 | 11.1    | 0.57    |
| 3 weeks after surgery                       | 11             |      | 10.7 |      |      |      |      |         |         |
| 4 weeks after surgery                       |                | 10   | 10.4 |      |      |      |      |         |         |
| 5 weeks after surgery                       |                | 9.5  | 10.2 |      |      |      |      |         |         |
| 6 weeks after surgery                       |                | 9.7  |      |      |      |      |      |         |         |
| D, Blood urea nitrogen (normal range, 8-20) |                |      |      |      |      |      |      |         |         |

| Examination                             | Patient number |      |      |      |      |      |      | Average | P-value |
|-----------------------------------------|----------------|------|------|------|------|------|------|---------|---------|
|                                         | 1              | 2    | 3    | 4    | 5    | 6    | 7    |         |         |
| Initial presentation                    | 9.7            | 43.5 | 11.7 | 20.7 | 15.5 | 13.7 | 14.2 | 18.4    |         |
| 1 week after surgery                    | 7              | 5.4  | 17.6 | 19.8 | 17.4 | 11.5 | 12.9 | 13.1    | 0.42    |
| 2 weeks after surgery                   | 7.2            | 8.3  | 10.2 | 15.4 | 22.2 | 13.6 | 12.8 | 12.8    | 0.20    |
| 3 weeks after surgery                   | 11             |      | 13.3 |      |      |      |      |         |         |
| 4 weeks after surgery                   |                | 5.8  | 13.2 |      |      |      |      |         |         |
| 5 weeks after surgery                   |                | 6    | 12   |      |      |      |      |         |         |
| 6 weeks after surgery                   |                | 6.9  |      |      |      |      |      |         |         |
| E, Creatinine (normal range, 0.65-1.07) |                |      |      |      |      |      |      |         |         |

| Examination                        | Patient number |      |      |      |      |      |      | Average | P-value |
|------------------------------------|----------------|------|------|------|------|------|------|---------|---------|
|                                    | 1              | 2    | 3    | 4    | 5    | 6    | 7    |         |         |
| Initial presentation               | 0.63           | 0.96 | 0.63 | 0.53 | 0.92 | 0.93 | 0.84 | 0.78    |         |
| 1 week after surgery               | 0.46           | 0.24 | 0.65 | 0.45 | 0.72 | 0.72 | 0.77 | 0.57    | 0.11    |
| 2 weeks after surgery              | 0.55           | 0.28 | 0.52 | 0.51 | 0.9  | 0.88 | 0.73 | 0.62    | 0.11    |
| 3 weeks after surgery              | 0.64           |      | 0.52 |      |      |      |      |         |         |
| 4 weeks after surgery              |                | 0.31 | 0.56 |      |      |      |      |         |         |
| 5 weeks after surgery              |                | 0.29 | 0.6  |      |      |      |      |         |         |
| 6 weeks after surgery              |                | 0.26 |      |      |      |      |      |         |         |
| F, Albumin (normal range, 4.1-5.1) |                |      |      |      |      |      |      |         |         |

| Examination                                       | Patient number |     |     |     |     |     |     | Average | P-value |
|---------------------------------------------------|----------------|-----|-----|-----|-----|-----|-----|---------|---------|
|                                                   | 1              | 2   | 3   | 4   | 5   | 6   | 7   |         |         |
| Initial presentation                              | 2.4            | 1.6 | 3.7 | 3.9 | 3.8 | 2.5 | 4.7 | 3.2     |         |
| 1 week after surgery                              | 2              | 2.4 | 2.4 | 3.2 | 2.6 | 2.1 | 3.8 | 2.6     | 0.23    |
| 2 weeks after surgery                             | 2.5            | 3   | 2.1 | 3.7 | 3.2 | 2.9 | 4.6 | 3.1     | 0.57    |
| 3 weeks after surgery                             | 2.8            |     | 2.5 |     |     |     |     |         |         |
| 4 weeks after surgery                             |                | 2.1 | 2.8 |     |     |     |     |         |         |
| 5 weeks after surgery                             |                | 2.4 | 2.9 |     |     |     |     |         |         |
| 6 weeks after surgery                             |                | 3   |     |     |     |     |     |         |         |
| G, Alanine aminotransferase (normal range, 10-42) |                |     |     |     |     |     |     |         |         |



| Examination                                         | Patient number |    |    |   |    |    |    | Average | P-value |
|-----------------------------------------------------|----------------|----|----|---|----|----|----|---------|---------|
|                                                     | 1              | 2  | 3  | 4 | 5  | 6  | 7  |         |         |
| Initial presentation                                | 14             | 24 | 17 | 6 | 12 | 38 | 23 | 19      |         |
| 1 week after surgery                                | 82             | 57 | 32 | 7 | 33 | 21 | 25 | 37      | 0.26    |
| 2 weeks after surgery                               | 30             | 82 | 19 | 8 | 15 | 14 | 26 | 28      | 0.87    |
| 3 weeks after surgery                               | 20             |    | 42 |   |    |    |    |         |         |
| 4 weeks after surgery                               |                | 34 | 30 |   |    |    |    |         |         |
| 5 weeks after surgery                               |                | 24 | 30 |   |    |    |    |         |         |
| 6 weeks after surgery                               |                | 23 |    |   |    |    |    |         |         |
| H, Aspartate aminotransferase (normal range, 13-30) |                |    |    |   |    |    |    |         |         |

| Examination                                | Patient number |    |    |    |    |    |    | Average | P-value |
|--------------------------------------------|----------------|----|----|----|----|----|----|---------|---------|
|                                            | 1              | 2  | 3  | 4  | 5  | 6  | 7  |         |         |
| Initial presentation                       | 17             | 56 | 19 | 11 | 17 | 22 | 21 | 23      |         |
| 1 week after surgery                       | 98             | 96 | 33 | 20 | 27 | 23 | 21 | 45      | 0.13    |
| 2 weeks after surgery                      | 24             | 46 | 15 | 22 | 19 | 17 | 16 | 23      | 0.69    |
| 3 weeks after surgery                      | 22             |    | 32 |    |    |    |    |         |         |
| 4 weeks after surgery                      |                | 42 | 18 |    |    |    |    |         |         |
| 5 weeks after surgery                      |                | 22 | 20 |    |    |    |    |         |         |
| 6 weeks after surgery                      |                | 27 |    |    |    |    |    |         |         |
| I, Total bilirubin (normal range, 0.4-1.5) |                |    |    |    |    |    |    |         |         |

| Examination           | Patient number |      |      |      |      |      |      | Average | P-value |
|-----------------------|----------------|------|------|------|------|------|------|---------|---------|
|                       | 1              | 2    | 3    | 4    | 5    | 6    | 7    |         |         |
| Initial presentation  | 0.47           | 2.3  | 1.1  | 0.55 | 0.72 | 0.88 | 0.83 | 0.98    |         |
| 1 week after surgery  | 0.32           | 0.6  | 0.61 | 0.49 | 1.28 | 0.36 | 0.5  | 0.59    | 0.14    |
| 2 weeks after surgery | 0.34           | 0.69 | 0.4  | 0.68 | 0.61 | 0.41 | 0.42 | 0.51    | 0.04    |
| 3 weeks after surgery | 0.4            |      | 0.48 |      |      |      |      |         |         |
| 4 weeks after surgery |                | 0.52 | 0.64 |      |      |      |      |         |         |
| 5 weeks after surgery |                | 0.3  | 0.66 |      |      |      |      |         |         |
| 6 weeks after surgery |                | 0.36 |      |      |      |      |      |         |         |
